# Supplementary material for: Readmissions Following a Hospitalization for Cardiovascular Events in Dialysis Patients: A Retrospective Cohort Study
Source: PubMed Central journal article supplement — J Am Heart Assoc. 2018 Feb 13;7(4):e007231. doi: 10.1161/JAHA.117.007231 (PMC5850182; doi:10.1161/jaha.117.007231), 2018-02-13

# **Supplemental Material**

## **Data S1.**

### **Details regarding determination of influenza season**

The timing and duration of the influenza season was determined by consulting the Centers for Disease Control and Prevention FluView website (<https://www.cdc.gov/flu/pastseasons/1112season.htm>). The 2011-2012 influenza season was markedly atypical: the intensity was mild, and the peak, which occurred during approximately 1 week in March, was the shortest time ever recorded above baseline and the smallest peak ever recorded. For modeling purposes, we did not explicitly consider this year to have had a demonstrable influenza season. In contrast, for the 2012-2013 season, the infection rate increased above baseline starting in early December 2012 and remained elevated for 15 consecutive weeks until the latter part of March. Thus, for modeling purposes, the influenza season was considered to be December 2012-March 2013.

## **Data S2.**

### **Supplemental Statistical Methods**

Since the analysis was hospitalization-based (as opposed to patient-based) and patients could contribute multiple admissions, correlation among hospitalizations from the same patient could have implications for model fitting. SAS Proc LOGISTIC can fit a multinomial logistic model for RR, but it cannot incorporate correlations among records. In contrast, Proc GENMOD can incorporate correlation, but it cannot fit a multinomial logistic model for RR. We therefore performed the following: first, we fit a simple logistic model (one outcome) with cumulative logit as the link function with/without considering the correlation among hospitalizations from the same patients; second, for each variable in the model, we compared the estimate of coefficients, the corresponding standard error, 95% confidence intervals, and  $P$  values from models with and without consideration of the correlations. These results were nearly identical, likely due to the large size of the dataset. Third, we made a decision to perform the multinomial logistic modeling with log RR as the link function using Proc LOGISTIC without consideration of the potential correlations. The multinomial models included the patient-level and hospitalization-level characteristics described in the main text as potential factors.

**Table S1.** Codes used to determine reasons for CVD-related admissions.

| Index conditions                 | ICD-9-CM Diagnosis Codes                                                                                                                                                                                                                         |
|----------------------------------|--------------------------------------------------------------------------------------------------------------------------------------------------------------------------------------------------------------------------------------------------|
| Acute coronary syndrome          | 410, 411                                                                                                                                                                                                                                         |
| Arrhythmia                       | 426, 427                                                                                                                                                                                                                                         |
| Cardiomyopathy and heart failure | 276.6, 425, 428                                                                                                                                                                                                                                  |
| Stroke                           | 430, 431, 433, 434, 436                                                                                                                                                                                                                          |
| Other CVD                        | 394, 395, 396, 397, 402, 402.01, 402.11, 402.91, 403, 404, 404.01, 404.03, 404.11, 404.13, 404.91, 404.93, , 413, 414, 415, 416, 417, 420, 421.9, 422.90, 422.99, 423, 424 ,429, 437, 438, 440, 441, 442, 443, 444, 445, 447, 451, 453, 459, 557 |

CVD, cardiovascular disease; ICD-9-CM, International Classification of Diseases, Clinical Modification.

**Table S2.** Outcome events following discharge from index hospitalization, within 10 or 30 days, by dialysis modality.

| Hospitalizations, <i>n</i> = 142,210 | Event                    |                               |                          |
|--------------------------------------|--------------------------|-------------------------------|--------------------------|
|                                      | All-Cause<br>Readmission | Cardiovascular<br>Readmission | Death, no<br>Readmission |
| 30-day outcomes, %                   |                          |                               |                          |
| Hemodialysis                         | 34.2                     | 14.9                          | 1.8                      |
| Peritoneal dialysis                  | 33.8                     | 11.9                          | 1.8                      |
| 10-day outcomes, %                   |                          |                               |                          |
| Hemodialysis                         | 15.6                     | 6.7                           | 0.9                      |
| Peritoneal dialysis                  | 15.3                     | 5.5                           | 0.9                      |

**Table S3.** Outcome events following discharge from index hospitalization, by region, within 10 or 30 days.

| Region (CMS)                      | Outcomes, 10 Days, % |     |                     |                  |                           |                        | Outcomes, 30 Days, % |      |                     |                  |                           |                        |
|-----------------------------------|----------------------|-----|---------------------|------------------|---------------------------|------------------------|----------------------|------|---------------------|------------------|---------------------------|------------------------|
|                                   | Readmission          |     | Death               |                  |                           | Other                  | Readmission          |      | Death               |                  |                           | Other                  |
|                                   | All-Cause            | CV  | Without Readmission | With Readmission | Regardless of Readmission | ED Visit/<br>Obs. Stay | All-Cause            | CV   | Without Readmission | With Readmission | Regardless of Readmission | ED Visit/<br>Obs. Stay |
| 1: CT, MA, ME, NH, RI, VT         | 16.4                 | 7.0 | 1.0                 | 0.7              | 1.7                       | 12.9                   | 34.7                 | 15.3 | 2.2                 | 3.2              | 5.3                       | 27.4                   |
| 2: NJ, NY, PR, USVI               | 17.0                 | 7.6 | 0.9                 | 0.7              | 1.6                       | 8.5                    | 36.1                 | 16.5 | 1.8                 | 2.7              | 4.5                       | 18.6                   |
| 3: DC, DE, MD, PA, VA, WV         | 16.1                 | 7.1 | 1.0                 | 0.6              | 1.5                       | 10.7                   | 35.4                 | 15.6 | 2.0                 | 2.7              | 4.6                       | 23.2                   |
| 4: AL, FL, GA, KY, MS, NC, SC, TN | 15.2                 | 6.6 | 0.8                 | 0.6              | 1.4                       | 12.4                   | 33.7                 | 14.8 | 1.8                 | 2.5              | 4.2                       | 25.9                   |
| 5: IL, IN, MI, MN, OH, WI         | 16.3                 | 6.7 | 1.0                 | 0.7              | 1.6                       | 11.8                   | 36.0                 | 15.1 | 1.9                 | 2.9              | 4.8                       | 25.6                   |
| 6: AR, LA, NM, OK, TX             | 14.0                 | 6.0 | 0.8                 | 0.4              | 1.2                       | 12.7                   | 31.6                 | 13.4 | 1.6                 | 2.4              | 4.0                       | 26.9                   |
| 7: IA, KS, MO, NE                 | 15.4                 | 6.3 | 1.0                 | 0.6              | 1.7                       | 12.7                   | 33.2                 | 13.8 | 2.3                 | 3.1              | 5.4                       | 26.4                   |
| 8: CO, MT, ND, SD, UT, WY         | 13.0                 | 4.7 | 1.4                 | 0.7              | 2.0                       | 11.8                   | 30.0                 | 10.2 | 3.1                 | 2.5              | 5.5                       | 25.9                   |
| 9: AS, AZ, CA, Guam, HI, NMI, NV  | 15.3                 | 6.4 | 0.8                 | 0.5              | 1.4                       | 9.9                    | 33.7                 | 14.2 | 1.5                 | 2.4              | 4.0                       | 21.3                   |
| 10: AK, ID, OR, WA                | 15.6                 | 6.2 | 1.7                 | 0.7              | 2.4                       | 16.6                   | 32.8                 | 12.9 | 2.8                 | 3.5              | 6.2                       | 32.7                   |
| Overall rate                      | 15.6                 | 6.6 | 0.9                 | 0.6              | 1.5                       | 11.6                   | 34.2                 | 14.7 | 1.8                 | 2.6              | 4.5                       | 24.6                   |

CMS, Centers for Medicare & Medicaid Services; CV, cardiovascular; ED, emergency department; Obs., observation.

**Figure S1.** Map of Centers for Medicare & Medicaid Services regions.

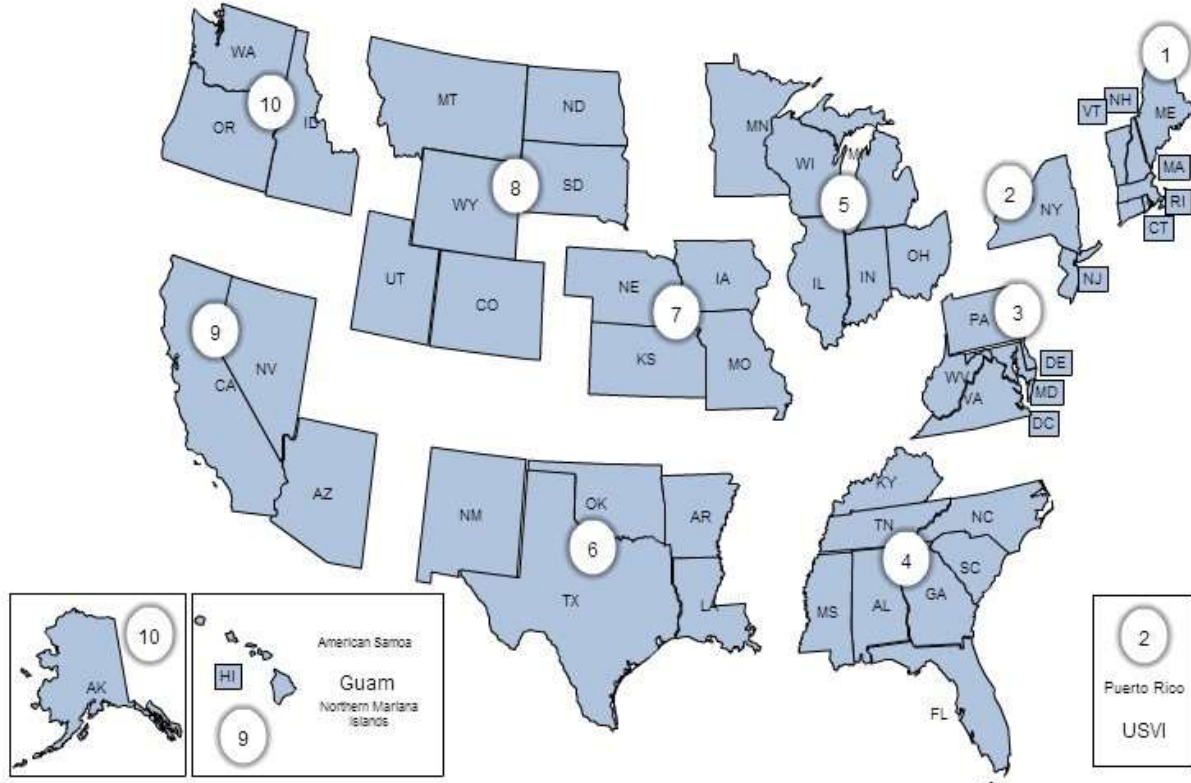

Supplement: JAH3-7-e007231-s001.pdf [file JAH3-7-e007231-s001.pdf]
